# Supplementary material for: Solid-Liquid Equilibrium Solubility and Molecular Simulation of BPAF in Different Pure Solvents
Source: Research Square preprint supplement (doi:10.21203/rs.3.rs-8332265/v1), 2025-12-19
Supplement: Supplementary file 1 [file 284e2595978209ac43eab913.docx]

**Solid-Liquid Equilibrium Solubility and Molecular Simulation of BPAF in Different**

**Pure Solvents**

Jiaqi Zhanga, Lihai Zhaib,c*, Huaimin Dongb, Chao Mab, Xiaolai Zhanga*

a Key Laboratory of Colloid and Interface Chemistry of the Ministry of Education, School of Chemistry and Chemical Engineering, Shandong University, Jinan, Shandong 250100, China

b Shandong New Time Pharmaceutical Co., Ltd., Linyi 273400, China

c School of Chemistry and Chemical Engineering, Taishan University, Taian 271000, China

**Corresponding author:* [*zhangxlai@sdu.edu.cn*](mailto:zhangxlai@sdu.edu.cn)

**Corresponding author: zlh8181@163.com*

**Table S1** Detailed information on the materials used in this worka,b

| Chemicals | CAS  Reg. No. | Molar  mass | Mass fraction Purity | Source |
| --- | --- | --- | --- | --- |
| Bisphenol AF | 1478-61-1 | 336.23 | ≥0.99 | Beijing Bailingwei Technology Co., Ltd. |
| Methanol | 67-56-1 | 32.042 | ≥0.995 | Shanghai Macklin Biochemical Co., Ltd |
| Ethanol | 64-17-5 | 46.07 | ≥0.997 | Shanghai Macklin Biochemical Co., Ltd |
| N-propanol | 71-23-8 | 60.10 | ≥0.995 | Shanghai Macklin Biochemical Co., Ltd |
| N-butanol | 71-36-3 | 74.121 | ≥0.995 | Shanghai Macklin Biochemical Co., Ltd |
| Isobutanol | 78-92-2 | 74.122 | ≥0.995 | Shanghai Macklin Biochemical Co., Ltd |
| Methyl acetate | 79-20-9 | 74.08 | ≥0.99 | Shanghai Macklin Biochemical Co., Ltd |
| Ethyl acetate | 141-78-6 | 88.105 | ≥0.99 | Shanghai Macklin Biochemical Co., Ltd |
| Acetonitrile | 75-05-8 | 41.052 | ≥0.99 | Sinopharm Chemical Reagent Co., Ltd |
| Acetone | 67-64-1 | 58.08 | ≥0.995 | Sinopharm Chemical Reagent Co., Ltd |
| Methylbenzene | 108-88-3 | 92.14 | ≥0.995 | Sinopharm Chemical Reagent Co., Ltd |
| Dichloromethane | 75-09-2 | 84.933 | ≥0.995 | Yantai Yuandong Fine Chemical Co., Ltd. |

a Material purity was provided by the supplier.

b All commercial materials were used without further purification.

**Table S2** Enthalpy of melting of BPAF (kJ/mol) for group contribution (mi)a

| Molecular fragments | Number(ni) | mi(X) | mi(Y) | mi(YY) | mi(ar) |
| --- | --- | --- | --- | --- | --- |
| >C< | 2 | 1.19 | - | - | - |
| >C< | 1 | - | - | -3.02 | - |
| Car | 4 | - | - | - | -0.86 |
| CHar | 8 | - | - | - | 1.59 |
| -OH | 2 | - | 6.16 | - | - |
| -F | 6 | 2.03 | - | - | - |

a Taken from Ref.

**Table S3** HSPs for BPAF and selected pure solvents

| solvents | HSP(MPa0.5) | | | | |
| --- | --- | --- | --- | --- | --- |
| δd | δp | δh | δt | δv |
| Methanol | 15.10 | 12.30 | 22.30 | 29.61 | 19.48 |
| Ethanol | 15.80 | 8.80 | 19.40 | 26.52 | 18.09 |
| N-propanol | 16.00 | 6.80 | 17.40 | 24.60 | 17.39 |
| N-butanol | 16.00 | 5.70 | 15.80 | 23.20 | 16.98 |
| Isobutanol | 15.80 | 5.70 | 14.50 | 22.19 | 16.80 |
| Methyl acetate | 15.50 | 7.20 | 7.60 | 18.70 | 17.09 |
| Ethyl acetate | 15.80 | 5.30 | 7.20 | 18.15 | 16.67 |
| Acetonitrile | 15.30 | 13.70 | 6.10 | 21.42 | 20.54 |
| Acetone | 15.50 | 10.40 | 7.00 | 19.94 | 18.67 |
| Methylbenzene | 18.00 | 1.40 | 2.00 | 18.16 | 18.05 |
| Dichloromethane | 18.20 | 6.30 | 6.10 | 20.20 | 19.26 |

**Table S4** Basic properties of selected solvents.

| Solvents（298.15K） | α | β | π* | VS/100RT | lnx1 |
| --- | --- | --- | --- | --- | --- |
| Methanol | 0.98 | 0.66 | 0.60 | 0.83 | -1.54 |
| Ethanol | 0.86 | 0.75 | 0.54 | 0.66 | -1.27 |
| N-propanol | 0.84 | 0.90 | 0.52 | 0.57 | -1.31 |
| N-butanol | 0.84 | 0.84 | 0.47 | 0.50 | -1.27 |
| Isobutanol | 0.79 | 0.84 | 0.40 | 0.48 | -1.25 |
| Methyl acetate | 0.00 | 0.42 | 0.60 | 0.36 | -1.01 |
| Ethyl acetate | 0.00 | 0.45 | 0.55 | 0.05 | -0.92 |
| Acetonitrile | 0.19 | 0.40 | 0.75 | 0.54 | -1.10 |
| Acetone | 0.08 | 0.48 | 0.71 | 0.46 | -0.91 |
| Methylbenzene | 0.00 | 0.11 | 0.54 | 0.31 | -4.59 |
| Dichloromethane | 0.13 | 0.10 | 0.82 | 4.05 | -5.24 |
